# Supplementary material for: Towards the Exploration and Evolution of Insulin-like Venoms in Actiniaria (Sea anemones)
Source: MDPI journal article supplement (doi:10.3390/md22030136), 2024-03-20
Supplement: s1 [file s1]

| Superfamily                   | Family           | Species                            | DATA              |
|-------------------------------|------------------|------------------------------------|-------------------|
| Actinioidea                   | Actiniidae       | <i>Actinia equina</i>              | Genome            |
|                               |                  | <i>Actinia tenebrosa</i>           | SRR3210696        |
|                               |                  | <i>Anthopleura buddemeieri</i>     | SRR3193961        |
|                               |                  | <i>Aulactinia veratra</i>          | SRR3205708        |
|                               |                  | <i>Cnidopus japonicus</i>          | SRR2134407        |
|                               |                  | <i>Condylactis gigantea</i>        | ERR2045165        |
|                               |                  | <i>Dofleinia armata</i>            | ERR6139597        |
|                               |                  | <i>Entacmaea quadricolor</i>       | Ref. Delgado 2022 |
|                               |                  | <i>Epiactis prolifera</i>          | Collaborators     |
|                               |                  | <i>Oulactis</i> sp.                | ERR2710216        |
|                               |                  | <i>Macroactyla dorensis</i>        | Ref. Delgado 2022 |
|                               | Actinodendridae  | <i>Actinodendron plumosum</i>      | SRR10500343       |
| Actinostoloidea               | Heteractidae     | <i>Heteractis crispa</i>           | Ref. Delgado 2022 |
|                               | Stichodactylidae | <i>Stichodactyla haddoni</i>       | Ref. Delgado 2022 |
| Edwardsioidea                 | Thalassianthidae | <i>Cryptodendrum adhaesivum</i>    | Ref. Delgado 2022 |
|                               |                  | <i>Heterodactyla hemprichi</i>     | Ref. Delgado 2022 |
| Actinostoloidea               | Actinostolidae   | <i>Stomphia coccinea</i>           | Collaborators     |
| Edwardsioidea                 | Edwardsiidae     | <i>Edwardsiella carnea</i>         | SRR6480800        |
|                               |                  | <i>Nematostella vectensis</i>      | Genome            |
| Metridioidea<br>(Cuticulate)  | Andvakiidae      | <i>Telmatactis australis</i>       | SRR3225580        |
|                               | Hormathiidae     | <i>Caliactis polypus</i>           | RR3205762         |
|                               | Nemanthidae      | <i>Nemanthus annamensis</i>        | SRR3228732        |
| Metridioidea<br>(Acuticulate) | Aiptasiidae      | <i>Aiptasiogeton eruptaurantia</i> | Sequenced         |
|                               |                  | <i>Bartholomea annulata</i>        | Collaborators     |
|                               |                  | <i>Bellactis lux</i>               | Sequenced         |
|                               |                  | <i>Exaiptasia diaphana</i>         | SRR13526542       |
|                               |                  | <i>Neoaipatasia morbilla</i>       | Sequenced         |
|                               | Aliciidae        | <i>Lebrunia danae</i>              | Collaborators     |
|                               |                  | <i>Triactis producta</i>           | SRR8297742        |
|                               | Boloceroideidae  | <i>Bunodeopsis globulifera</i>     | Collaborators     |
|                               | Diadumenidae     | <i>Diadumene leucolena</i>         | Collaborators     |
|                               |                  | <i>Diadumene lineata</i>           | SRR8297741        |
|                               | Metridiidae      | <i>Metridium senile</i>            | SRR6480802        |
|                               | Sagartiidae      | <i>Sagartia elegans</i>            | Collaborators     |

Supplemental Table S1. Samples name and origin of data. Samples either were retrieved from NCBI using SRAs, gathered from collaborators and or sequenced for this study.
